# Supplementary material
Source: publisher site journal article supplement (https://www.dovepress.com/article/270711)
Supplement: Supplementary file 1 [file get_supplementary_file.php]

## Appendices

### Appendix IA – Interview questions (Spanish version)

#### Nulípara

- Q1. Díganos su nombre y un poco sobre usted y su familia.
- Q2. ¿Cómo espera que sea la experiencia de dar a luz?
- Q3. ¿Cómo se enteró de lo que una mujer tiene que anticipar durante el parto?
- Q4. ¿Qué propósito tiene el dolor que una mujer siente durante el parto?
- ¿Qué otras funciones desempeña el dolor durante el parto?
  - ¿De qué manera el dolor puede ser útil, bueno o positivo?
  - ¿Cómo puede el dolor ser inútil o negativo?
- Q5. ¿Cuáles son algunas de las estrategias que planea utilizar para hacer frente al dolor de parto?
- ¿Cómo crees que te ayudará?
  - ¿Tiene alguna otra estrategia?
- Q6. Si usted tiene un minuto para hablar con el doctor que ayudara a dar a luz a su bebé, ¿qué le diría al doctor acerca de la manera de que usted quiere que la traten?

#### Multíparas

- Q1. Cuéntenos su nombre y un poco sobre usted y su familia.
- Q2. Antes de dar a luz a su primer hijo, ¿cuál era la expectativa que usted tenía de cómo iba a ser su primer parto?
- Q3. ¿Aquellas expectativas coincidieron con lo que realmente sucedió?
- ¿Qué otras expectativas no coincidían con lo que realmente sucedió? ¿Qué fue lo (más) sorprendente de su parto?
- Q4. ¿Qué propósito tiene el dolor que una mujer siente durante el parto?
- ¿Qué otras funciones desempeña el dolor durante el parto?
  - ¿De qué manera el dolor puede ser útil, bueno o positivo?
  - ¿Cómo puede el dolor ser inútil o negativo?

Q5. ¿Cuáles son algunas de las estrategias que ha utilizado o planea utilizar para hacer frente al dolor del parto?

- ¿Cómo dirías que esas estrategias te ayudaron?

Q6. Supongamos que tuviste un minuto para hablar con una mujer que esta a punto de dar a luz por primera vez; ¿qué le dirías?

Q7. ¿Haz tenido una experiencia espiritual durante tu parto?

Q8. ¿Cuál es el propósito de las expectativas?

- ¿Crees que sería útil si sentías que el dolor sentido durante el parto tiene un propósito?
- ¿Qué tan útiles fueron las expectativas que usted tenía antes de dar a luz cuando las cosas iban bien, y que tan útiles fueron las expectativas cuando las cosas no iban bien?

Q9. ¿Ha tenido otras experiencias dolorosas que ayudaron a formar sus expectativas de lo que iba a sentir durante su parto?

## **Appendix IB – Interview questions (English version)**

### Nulliparous

- Q1. Tell us your name and a little bit about yourself and your family.
- Q2. What do you expect labor to be like?
- Q3. How did you learn about what to expect during labor?
- Q4. What role does pain play in labor?
- What other roles does pain play in labor?
  - In what ways can pain be helpful, good, or positive?
  - How can pain be unhelpful or negative?
- Q5. What are some strategies that you plan to use to cope with labor pain?
- How do you think that will help?
  - Do you have any other strategies?
- Q6. Suppose you had one minute to talk with your obstetrician care provider who will deliver your baby, what would you tell them about how you want your labor to be and how you want them to treat you?

### Multiparous

- Q1. Tell us your name and a little bit about yourself and your family.
- Q2. Thinking back before you had your first child, what did you expect labor to be like?
- Q3. Now, we just talked about your expectation of labor and what was your labor really like? Did your expectations match what actually happened?
- What other expectations did not match what actually happened? What (else) was surprising?
- Q4. What role does pain play in labor?
- What other roles does pain play in labor?
  - In what ways can pain be helpful, good, or positive?
  - How can pain be unhelpful or negative?
- Q5. What are some strategies that you've used or plan to use to cope with the pain of labor?

- How would you say those things helped?

Q6 Suppose you had one minute to talk to a soon to be mom about childbirth; what would you say?

Q7. Did you have a spiritual experience?

Q8. What's the role of expectations?

- Do you think it would be helpful if you felt that pain has a purpose in labor?
- How helpful is that when things are going well and how helpful is that when things are not going well?

Q9. Have you had other painful experiences that they used to base their expectations?

**Appendix IIA – Spanish Version**

|                                                                                                                          | Muy en desacuerdo        | En desacuerdo            | Neutral                  | De acuerdo               | Totalmente de acuerdo    |
|--------------------------------------------------------------------------------------------------------------------------|--------------------------|--------------------------|--------------------------|--------------------------|--------------------------|
| 1. Soy extremadamente sensible al dolor.                                                                                 | <input type="checkbox"/> |
| 2. El dolor hará que el parto sea menos agradable.                                                                       | <input type="checkbox"/> |
| 3. Yo no espero tratamiento médico para mi dolor.                                                                        | <input type="checkbox"/> |
| 4. Enfrentar el dolor del parto es una de las mejores experiencias de la vida de una madre.                              | <input type="checkbox"/> |
| 5. Vale la pena el dolor de la colocación de la anestesia epidural.                                                      | <input type="checkbox"/> |
| 6. El dolor hará más difícil el proceso del parto.                                                                       | <input type="checkbox"/> |
| 7. Dolor excesivo durante el parto me hará daño.                                                                         | <input type="checkbox"/> |
| 8. Mi dolor de parto me ayudará a crecer espiritualmente.                                                                | <input type="checkbox"/> |
| 9. El dolor me distraerá de la tarea de dar a luz a mi bebé.                                                             | <input type="checkbox"/> |
| 10. El dolor es la forma que tiene la naturaleza para ayudarme a sentir que el nacimiento es importante y significativo. | <input type="checkbox"/> |
| 11. Los medicamentos hacen más difícil la experiencia del parto.                                                         | <input type="checkbox"/> |
| 12. Tengo un nivel muy alto de tolerancia al dolor.                                                                      | <input type="checkbox"/> |
| 13. El dolor dificulta la tarea de estar completamente presente en la experiencia del parto.                             | <input type="checkbox"/> |
| 14. Enfrentar el dolor del parto hará la experiencia más satisfactoria.                                                  | <input type="checkbox"/> |
| 15. Los medicamentos cambian la experiencia del parto en una forma negativa.                                             | <input type="checkbox"/> |

**Appendix IIB – Survey (English version)**

|                                                                                              | Strongly Disagree        | Disagree                 | Neutral                  | Agree                    | Strongly Agree           |
|----------------------------------------------------------------------------------------------|--------------------------|--------------------------|--------------------------|--------------------------|--------------------------|
| 1. I am extremely sensitive to pain.                                                         | <input type="checkbox"/> |
| 2. Pain will make the birth less enjoyable.                                                  | <input type="checkbox"/> |
| 3. I do not expect medical treatment for my pain.                                            | <input type="checkbox"/> |
| 4. Facing the pain of childbirth is one of life's ultimate                                   | <input type="checkbox"/> |
| 5. The pain of placing the epidural is worth it.                                             | <input type="checkbox"/> |
| 6. The pain will make the birth more difficult.                                              | <input type="checkbox"/> |
| 7. Too much labor pain will harm me.                                                         | <input type="checkbox"/> |
| 8. My childbirth pain will help me to grow spiritually.                                      | <input type="checkbox"/> |
| 9. Pain will distract me from the task of giving birth to                                    | <input type="checkbox"/> |
| 10. Pain is nature's way of helping me feel how                                              | <input type="checkbox"/> |
| 11. Medications make the birth experience more                                               | <input type="checkbox"/> |
| 12. I have a very high tolerance for pain.                                                   | <input type="checkbox"/> |
| 13. The pain will make it difficult for me to be completely present in the birth experience. | <input type="checkbox"/> |
| 14. Facing the pain of childbirth will make the experience more fulfilling.                  | <input type="checkbox"/> |
| 15. Medications change the birth experience in a                                             | <input type="checkbox"/> |
